# Supplementary material for: Labral Reconstruction: When to Perform and How
Source: PubMed Central journal article supplement (PMC4489330; doi:10.3389/fsurg.2015.00027), 2015-07-02
Supplement: table_1.pdf [file table_1.pdf]

**Table S1. Indications and contraindications for arthroscopic labral reconstruction**

| <b>Indications</b>                        | <b>Contraindications</b>                                       |
|-------------------------------------------|----------------------------------------------------------------|
| - Irreparable labral tear                 | - Age >60 years                                                |
| - Intrasubstance degeneration             | - Joint space <50% of contralateral joint space                |
| - Labral tissue <2-3mm                    | - Loss of 50% of hip rotation arc                              |
| - Labral tissue >8mm                      | - Significant loss of joint space on sagittal sequences on MRI |
| - Previous labral surgery                 |                                                                |
| - Rim ossification                        |                                                                |
| - Severe pincer with lateral CE angle >45 |                                                                |
