# Supplementary material for: Labral Reconstruction: When to Perform and How
Source: PubMed Central journal article supplement (PMC4489330; doi:10.3389/fsurg.2015.00027), 2015-07-02
Supplement: table_2.pdf [file table_2.pdf]

**Table S2. Pearls and pitfalls for the “experienced hip arthroscopist” but “novice labral reconstructionist”**

| <b>Pearls</b>                                                                                                                                                                                                                                                                                                                                                                                                                                                                                                                                                                                                                                                                                                                                                                                       | <b>Pitfalls</b>                                                                                                                                                                                                                                                                                                                                                                                                                                                                                                                                                                                                                                |
|-----------------------------------------------------------------------------------------------------------------------------------------------------------------------------------------------------------------------------------------------------------------------------------------------------------------------------------------------------------------------------------------------------------------------------------------------------------------------------------------------------------------------------------------------------------------------------------------------------------------------------------------------------------------------------------------------------------------------------------------------------------------------------------------------------|------------------------------------------------------------------------------------------------------------------------------------------------------------------------------------------------------------------------------------------------------------------------------------------------------------------------------------------------------------------------------------------------------------------------------------------------------------------------------------------------------------------------------------------------------------------------------------------------------------------------------------------------|
| <ul style="list-style-type: none"> <li>- Normal traction utilized</li> <li>- Access to the anterior inferior joint is possible with ability to work through the peripheral compartment when not in traction</li> <li>- Access for anchor placement and graft fixation is made using the distal portal and percutaneously through the anterior inferior capsule</li> <li>- Anchor placement and graft shuttling occurs in traction through the distal accessory portal through the intact anterior inferior capsule</li> <li>- 3 portals are required so that tension can be maintained on the graft when fixing it front-to-back</li> <li>- Anterior acetabulum best visualized from anterior lateral portal</li> <li>- Posterior acetabulum best visualized from anterior medial portal</li> </ul> | <ul style="list-style-type: none"> <li>- Excess traction should not be employed</li> <li>- Anchor placement is critical – the graft is sensitive to eversion and the anchors must be placed perfectly, as close to the edge of the acetabulum as possible without penetrating subchondral bone</li> <li>- Access to entire acetabulum is necessary, and surgeon must be comfortable placing anchors around entire acetabulum</li> <li>- Important to preserve the anterior capsule</li> <li>- Meticulous graft preparation is important so the graft is workable for a reasonable time within the joint without swelling or fraying</li> </ul> |
